# Supplementary material for: Development of the WHO-INTEGRATE evidence-to-decision framework: an overview of systematic reviews of decision criteria for health decision-making
Source: Cost Eff Resour Alloc. 2020 Feb 11;18:8. doi: 10.1186/s12962-020-0203-6 (PMC7014604; doi:10.1186/s12962-020-0203-6)
Supplement: Supplementary file 4 — Additional file 4. Overview of evidence considerations and principles. [file 12962_2020_203_MOESM4_ESM.xlsx]

## Sheet: Criterion Evidence
Additional File 4 - Overview of evidence considerations and principles
Criteria	Sub-Criteria	Aspects
Evidence considerations		Characteristics of evidence[25]
	evidence in general [1,2,11,12,13,15,17,21,23,31,33,36]	availability & adequacy of evidence[7,18,22,25,28,34] evidence / proof of effectiveness & safety [2,11,21,23,31] evidence on cost, budget impact or cost-effectiveness [11,36] evidence[1,2,11,12,15,31,33,36] Evidence-based medicine[36] nature of technology/medicines (proven; new; inveestigational therapy)[13] scientific proof or evidence [2,11,17,33]	1
	stength of evidence in general [2,11,12,21,25,36]	power of evidence[25] robustness of evidence[12] level of evidence[2,21,36] strength of evidence[2,11,21]
	Certainty of evidence (in general) [2,5,6,11,16,21,22,23,24,26,28,33,36]	certainity of benefit[11] certainty / uncertainty of the Evidence [2,5,6,11,16,26,28,33,36] unecertainity of economical evidence[11,36] uncertainity of evidence on benefits and harms[11,21,23,24] technology is still experimental (maturity)[22]
	Quality of evidence [2,4,5,6,11,14,15,16,17,18,19,20,21,22,25,26,28,29,33,34,36]	quality of evidence [2,4,6,11,14,15,16,17,18,20,21,22,26,25,28,29,33,34,36] quality of economical evidence [5,19,25] quality of evidence on benefits and harms [19,25] methodological issues[5,11,25] data limitations[36] studies published in reputable international journal, if possible meta-analysis or Cochrane reviews[34]
	Completeness of evidence [2,6,12,14,25,26]	completeness evidence[2,6,12,14,25,26] number of available evidence[25] comprehensive[9]
	Validity of evidence [2,6,25,26,29,36]	validity of evidence[2,6,25,26,29] Economic model validity[36]
	Credibility of evidence [29,34,36]	level of confidence in the estimated effect on health outcomes[34] Credibility[36] integrity of evidence[29]
	directness of evidence [2,11,28]	direct vs indirect clinical evidence[28] choice of bendpoints (Type of outcome; surrogate; intermediate, final)[2,11]
	Consistency of evidence [2,6,14,25,26,29,33]	Consistency of evidence[2,6,14,25,26,29,33]
	Precision of evidence effect [2]	precision of treatment effect[2]
	Relevance of evidence [2,6,11,25,26,27,28,29]	relevance of evidence[2,6,11,25,26,27,28,29]
	Applicability & generalizability of evidence [2,11,22]	level of generalization[2] effectiveness in real practice[2] fidelity (to the trial)[22] representativeness of study participants (studies vs. real world)[2,11]
	Type and quality of evidence sources [2,11,17,21,34,35]	national and international clinical trials [2,11,17,34,35] multiple randomized trials or meta-analysis/single randomized trial of reasonable size/small randomized trial[2] normative characteristics of study (Trial size; duration)[11] local and international expert recommendation/oppinion [21,34] selection of studies[2] therapy mechanism of action (pharmacological profile[11]
	Experience based evidence [26,34,35]	experience by other countries with intervention[34,35] clinical experience[26]
	Evidence requirements [2,5,25]	adherence to requirement of decision making body[2,25] requirement of cost-utility analysis for final decision[5] requirements of evidence[25]

## Sheet: Research Priority Setting
Criteria	Sub-Criteria	Aspects
Considerations for resarch priority setting	answerability of research question [10,27]	answerability of research project[10,27]
	fundability of research [27]	fundability[27]	1
	attractiveness & originality of research topic [2,9,10,12,21,25,27,32]	attractiveness and originality[27] expected level of interest (patient and medical)[2] attractive subjects for reading and what experts believe about us ers/patients’ needs or wants were used[25] Is there media or patient interest and demand for this technology?[32] innovation[9,10,12,21]
	research fills gap or reduces uncertainity [8,10,25,27,32]	availability / lack of scientific evidence // fills gap [8,10,27] Existing controversy surrounding the clinical issues[32] Importance of initial assessment?[25] users/patients, unmet information needs[25] assessment benefits for reduction of uncertainites[25,32]
	potential for breaktrhough [27]	potential for breakthrough[27]
	Avoidance of dublication [8,10,32]	avoidance of dublication[8,10,32]
	clarity of research [27]	clarity[27]
	potential for translation of research [27]	potential for translation[27] operationalizability[27]
	usefulness of research [8,10,25,27,32]	impact of HTA results/dissemniation of technology[8] likelihood that HTA results are going to be implemented[8] policy relevance[10] Potential benefits of the research projects[25] potential impact / influence on health care[10,25] potential impact / influence on policy[10,25,32] potential of interpreting the new knowledge[25] Users/patients, unmet information needs[25] Usefulness (eg, for guidin…
	research ethics [2,10,25,27]	ethical[27] informed consent[2] moral consequence of HTA[2] new knowledge in an ethical manner[10] normative characteristics of study[2] research ethics[2,10,25] researchers ethics interests[2]
	cost-effectiveness of HTA [32]	What is the potential cost-effectiveness of conducting an assessment?[32]
	Sustainability of usefulness of results [2,25,27,32]	timeliness of review: . Does technology relate to an area where clinical practice is changing rapidly?[2, 33] How long may benefits identification last?[25] sustainability[27]
	short term useful ness of intvormation [2,32]	time of assessment in technology development[2] timeliness of review: Will the review be most useful if performed in the current fiscal year?[32] information follow-up in time [6]
	relevance of review for other countries [10]	likelihood of review to be revlevant to other countries[10] importance to developing countries[10]
	political consideration [2]	HTA’s producer interest[2]

## Sheet: Principles
Decision-making Principles	Principles	Coments and Aspects
	autonomy[19]
	basic human rights[2]
	beneficence/non-maleficience[2]
	beneficence[2]
	benefit of the greates number [4]
	citizenship[2]
	cohesion[2]
	collectivism[2]
	concern for the worse off
	distributive justice[2,36]
	diversity[2]
	efficency(maximum benefit for the greatest number[11]
	Fair innings[36]
	Fairness[11]
	formal justice[2]
	human integrity and dignity[2]
	human value principle [23,24]	Characteristics of patients such as age, sex, social position and income, must not influence decision;; sociodemographic characteristics of patient populations cannot influence decisions)
	justice[2]
	Marginal utility principle[36]
	moral obilations to implement care[11]
	moral obligation to implement a technology[2]
	mutuality[2]
	need (combination of criteria related to burden of disease; number of affected populations, severity of disease & availability of alternative interventions)	apparent need[2] clinical need[2,11,22,23,24] community need[22] importance for patient condition[26] individual / patient need[2,11,22,31] health needs of population[14] meeting identified health need[14] necessity[9] need (in terms of the number of beds per directorate, medical emergencies and the patient load)[1] need [1,2,11,19,20,25,27,33] perceived need in the hospital's catchment area[13] …
	need and solidarity[20,23,24]	patient in greatest need or "worse off" must be given priority"
	non-maleficience and justice[2]
	ownership[2]
	Principle of human dignity[36]
	Principle of need & solidarity[36]
	priority to basic and necessary care[2,11]
	rationality[24]
	reciprocal trust[2]
	responsiveness[2]
	Rule of rescue [2,11,13,28,36] (Rescuing those in peril, independant of the cost)
	social injustice[2]
	social justice[2]
	social utility[24]	i.a. equity
	solidarity principle[2,11,12,19,23,24]
	universality25]
	utilitarism[2]
	utility[2,6]
	[honesty and informational autonomy][11]

## Sheet: References
Reference	Study ID	Comments
1	Youngkong 2009
2	Guindo 2012
3	Waithaka 2018
4	Wiseman
5	Fischer 2012
6	Wahlster 2015
7	Ricciardi
8	Specchia
9	Hayati
10	McGregor
11	McLeod
12	Angelis 2018
13	Barasa
14	Cromwell
15	Burchett
16	Varela-Lema 2016	Publication in spanish. Criteria soley based on Guindo et al. or Golan et al. Were not extracted, as these studies are included in this study. Tanios et al., Tromp and Baltussen, are originally published in english; therefore original publication, rather than the spanish publiction was extracted. Pluddemann et al excluded due to focus on diagnostics.
17	Vuorenkoski 2008
18	Cowles 2017
19	Golan
20	Erntoft 2011
21	Friedmann 2018
22	Olholm 2015
23	Stafinski 2011 HTFDMAW
24	Stafinski 2011 RoCRPfmRDonHTiE
25	Mobinizadeh 2016 CfHTs
26	Marsh 2014 AtVoHCI	specific criteria (i.a. arm-hand function; sexual dysfunction) were excluded; inclusion of criteria on generalized level (e.g. adverse events)
27	Rudan 2017
28	Ghijben 2018
29	Drake 2017
30	Diaconu 2017
31	Polisena 2013	specific aspects were generalized e.g "Clinical effectiveness of treatments for infertility was considered" ; reformulation of specific criteria
32	Noorani 2007	Table 2 was used; criteria were reformulated by author
33	Johnson 2009
34	González-Lorenzo 2015	shortended and adapted
35	Piso 2009
36	Niessen 2012
